# Supplementary material for: Constitutive Expression in Komagataella phaffii of Mature Rhizopus oryzae Lipase Jointly with Its Truncated Prosequence Improves Production and the Biocatalyst Operational Stability
Source: MDPI journal article supplement (doi:10.3390/catal11101192), 2021-09-30
Supplement: s1 [file s1]

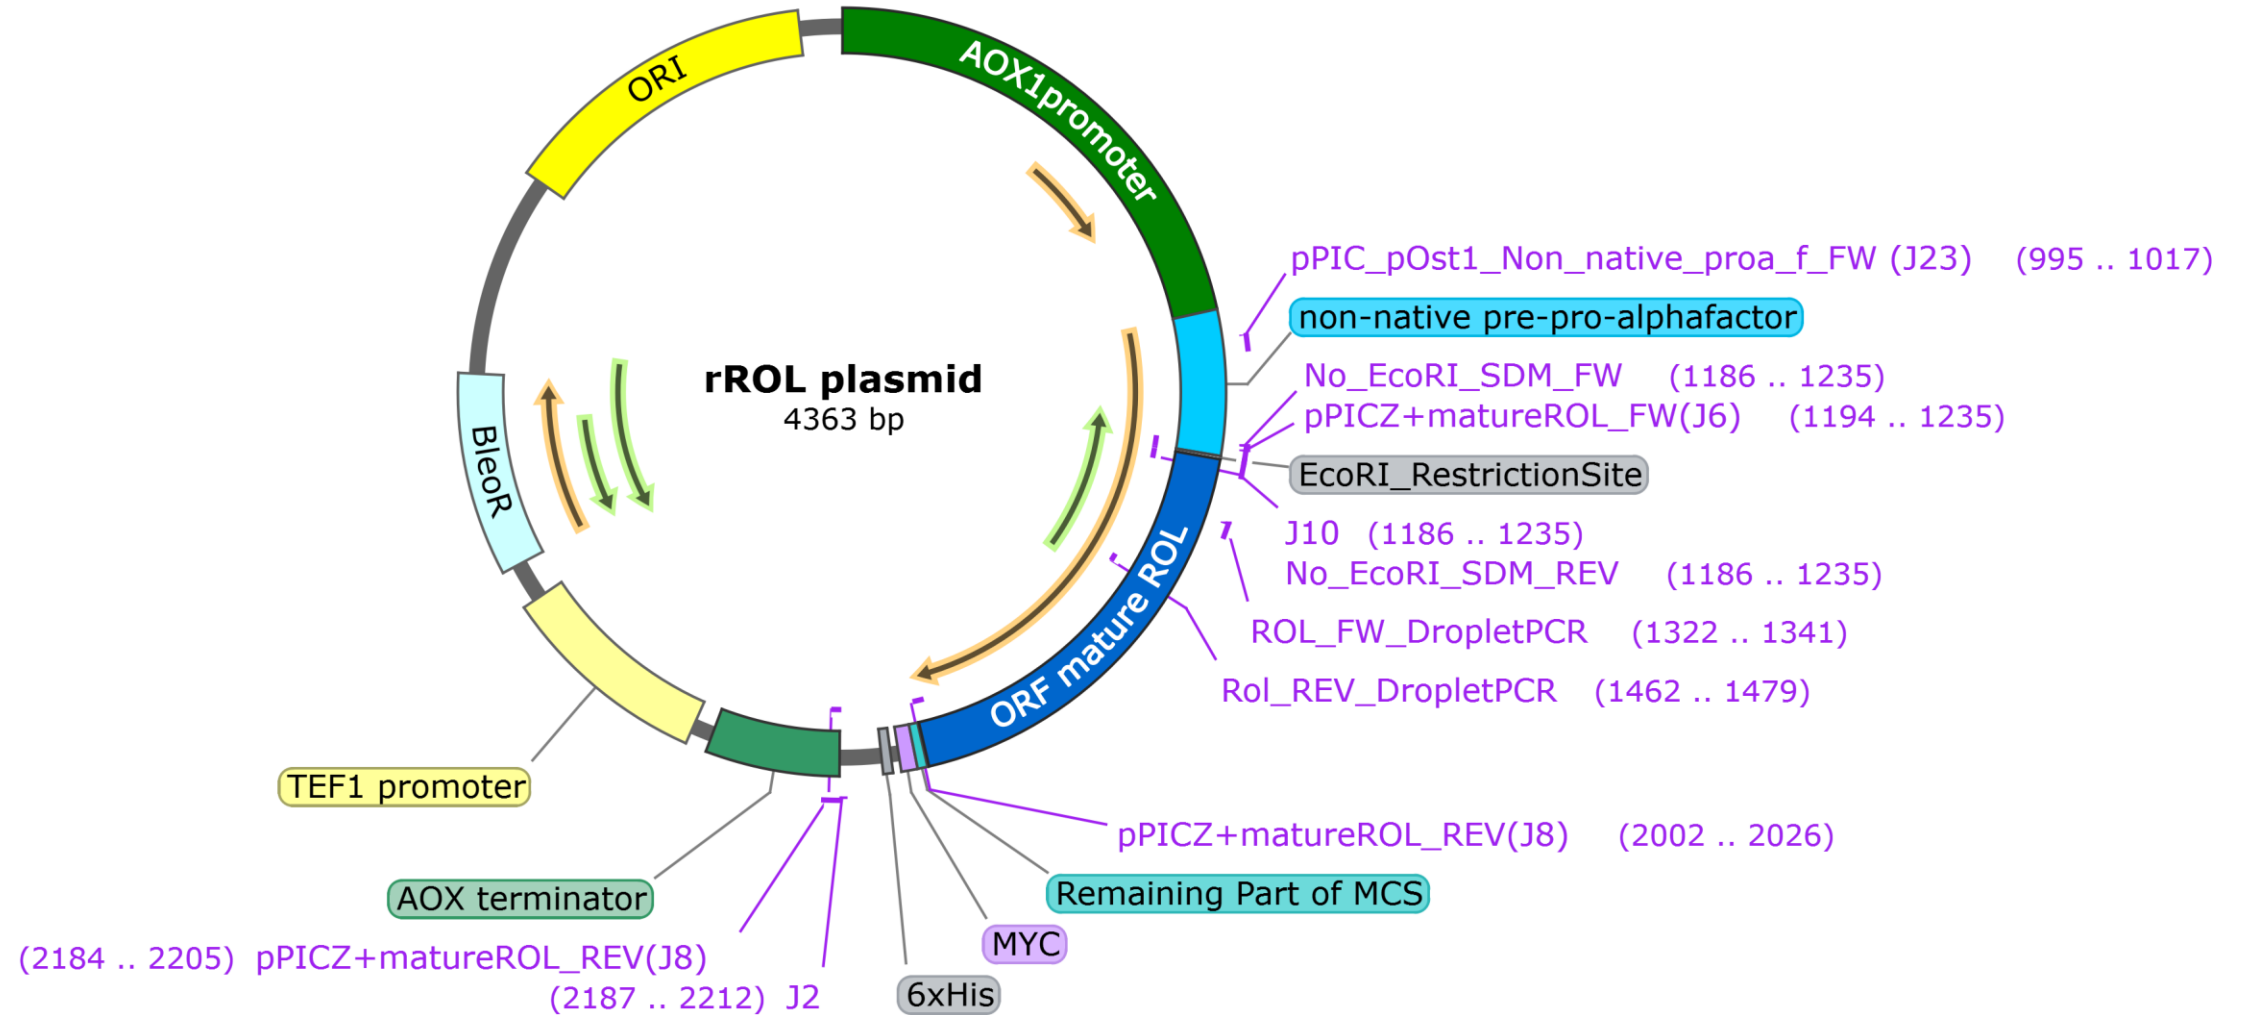

Figure S1 - rROL  $P_{AOX1}$ -plasmid: Plasmid containing the sequence of rROL under  $P_{AOX1}$ .

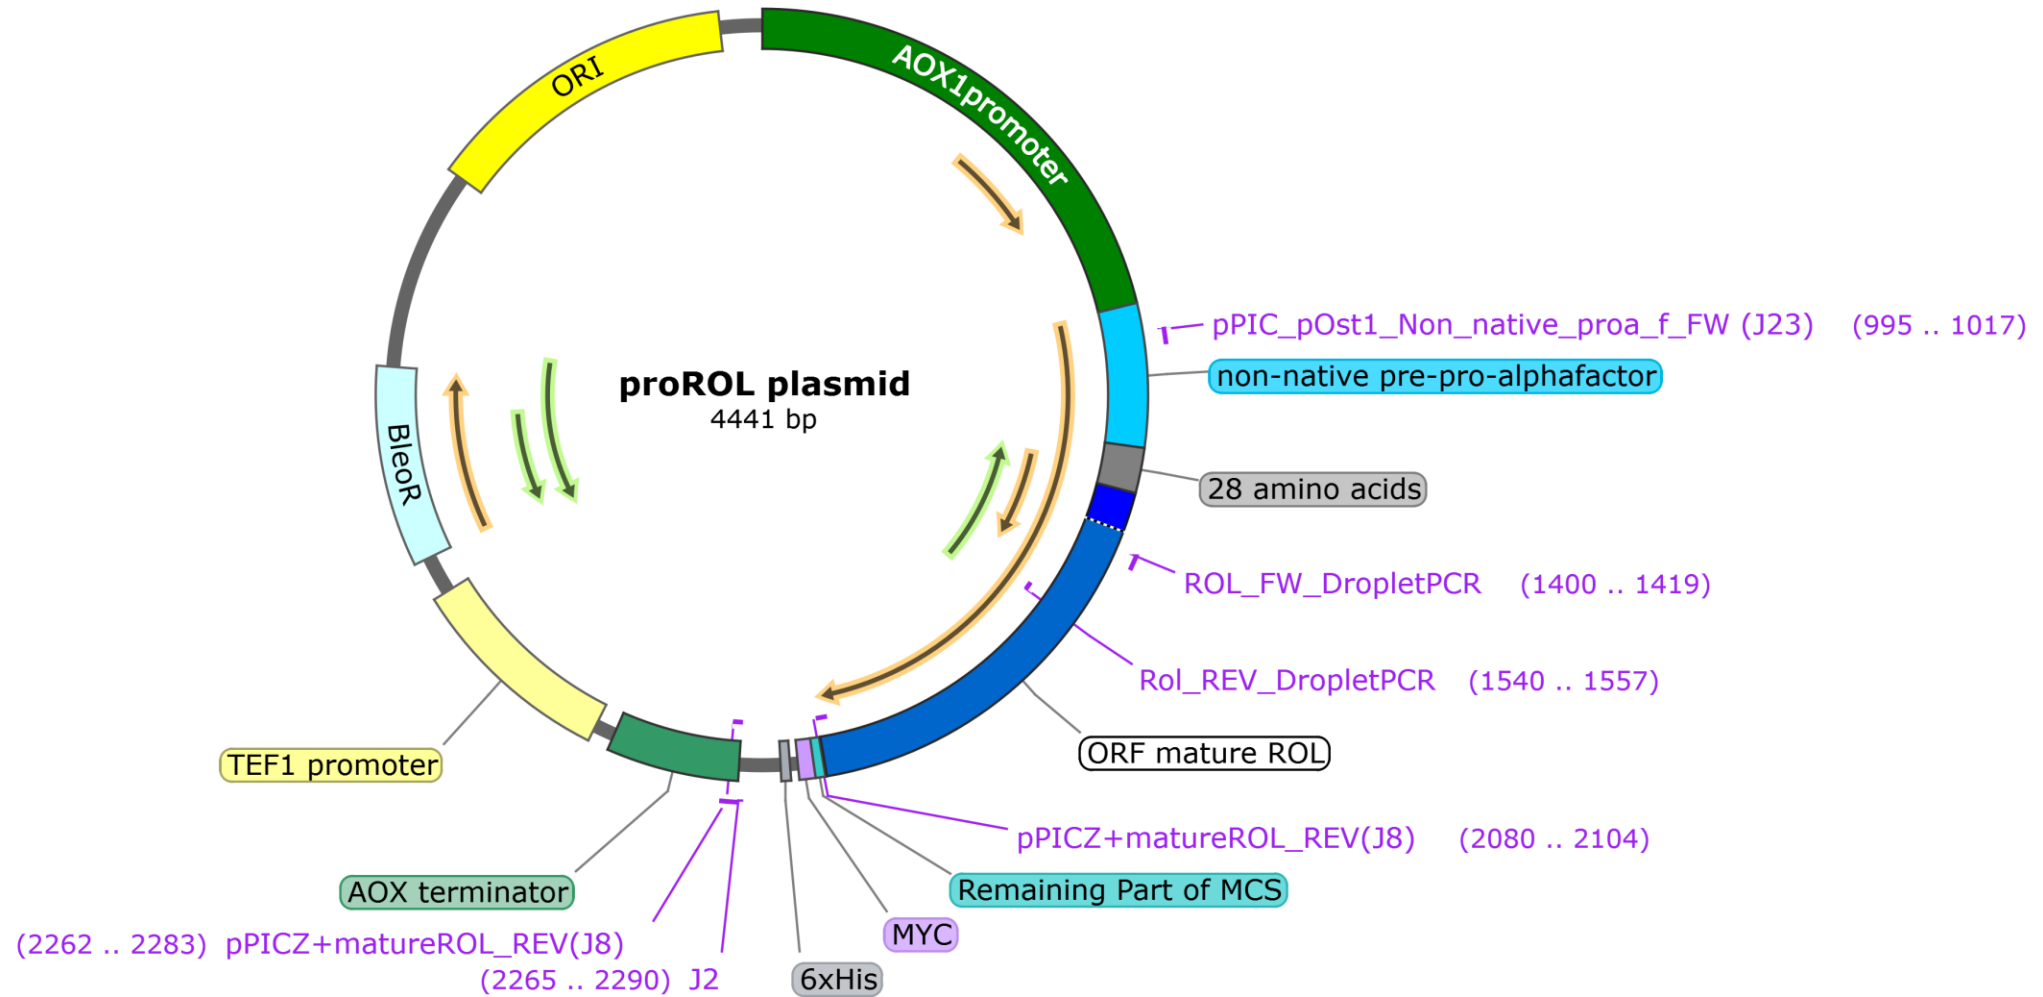

Figure S2 - proROL  $P_{AOX1}$ -plasmid: Plasmid containing the sequence of proROL under  $P_{AOX1}$ .

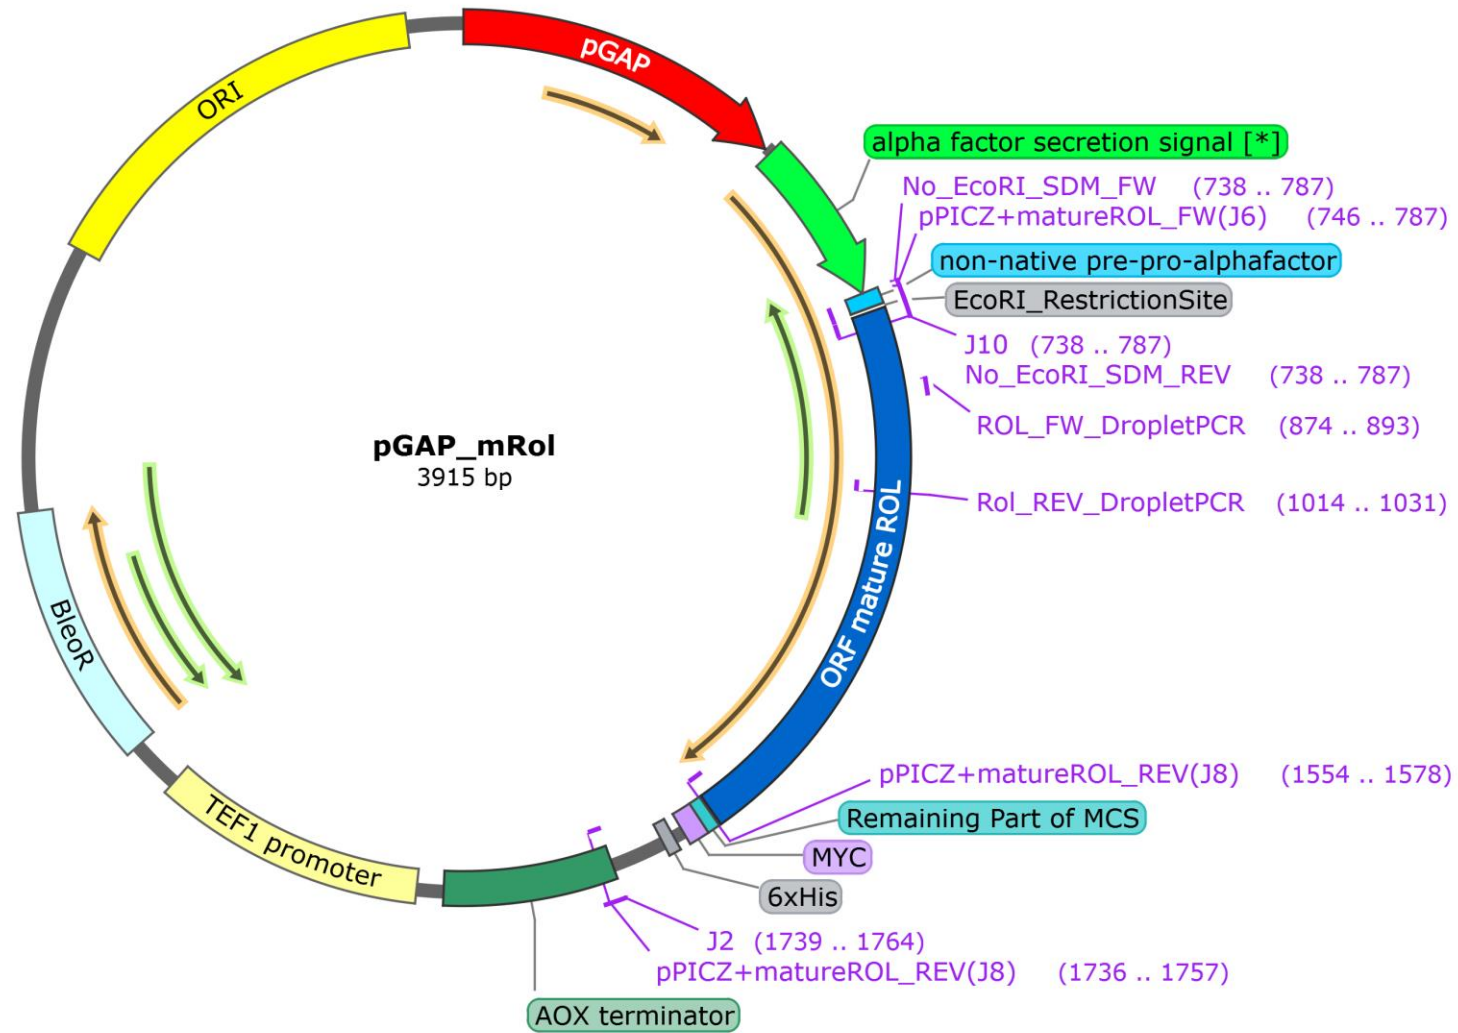

Figure S3 - rROL  $P_{GAP}$ -plasmid: Plasmid containing the sequence of rROL under  $P_{GAP}$ .

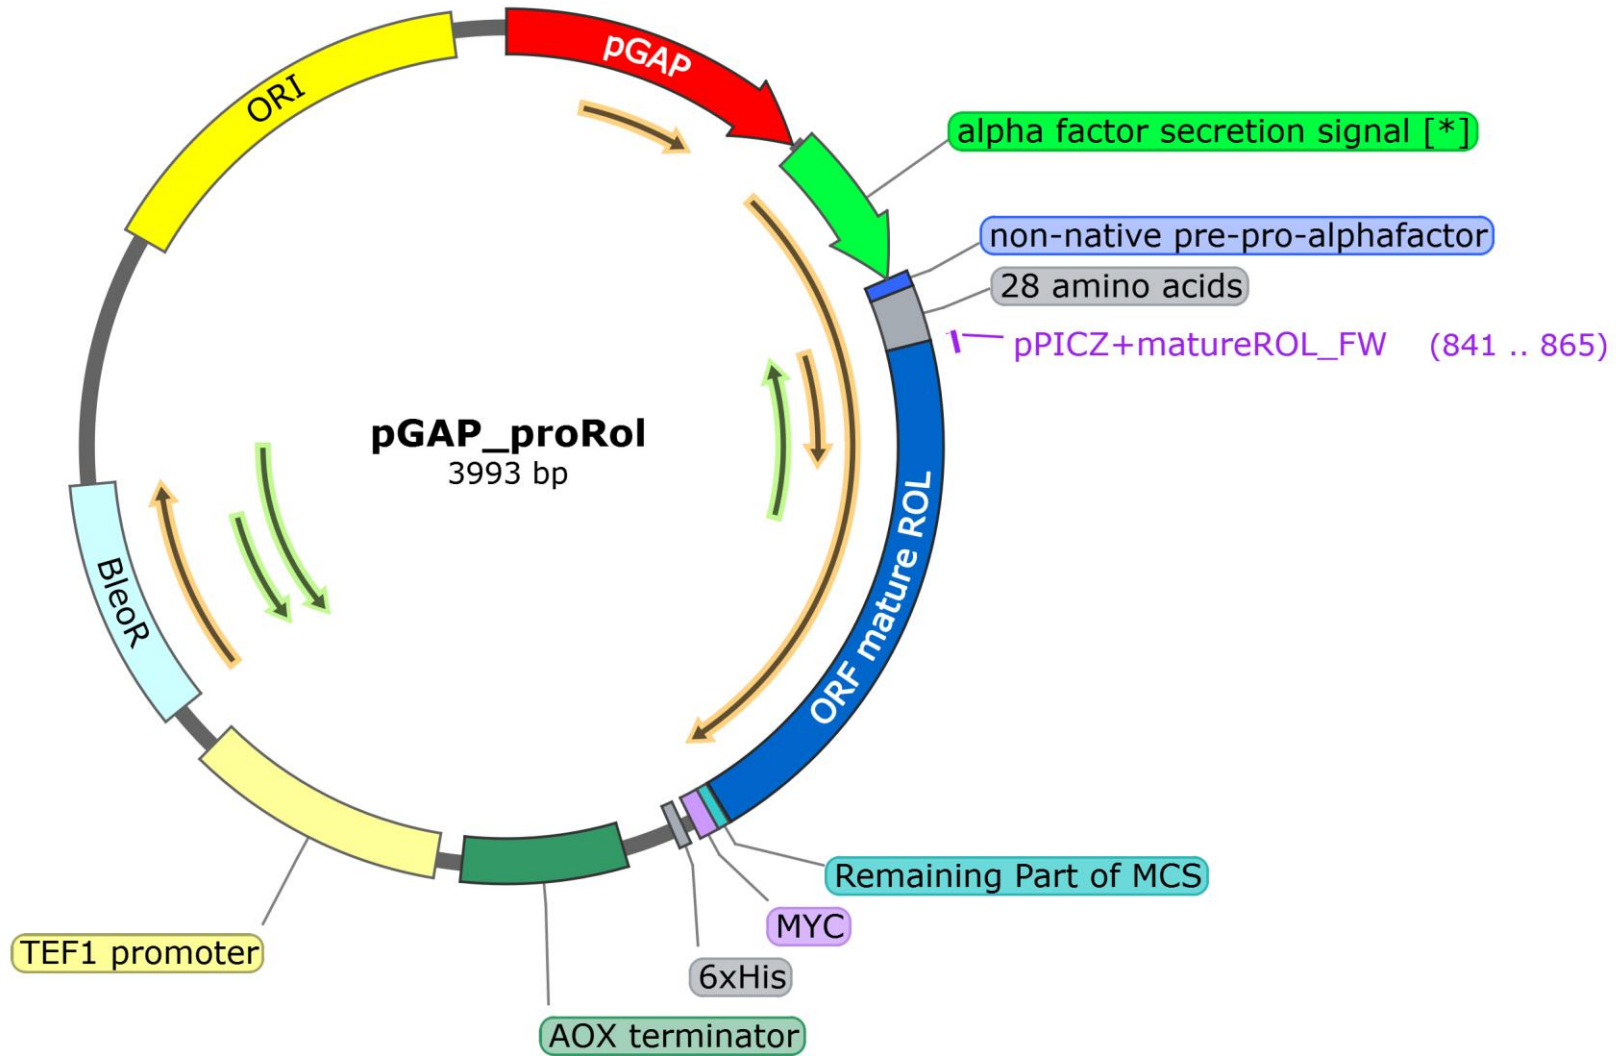

Figure S4 - proROL  $P_{GAP}$ -plasmid: Plasmid containing the sequence of proROL under  $P_{GAP}$ .
