# Supplementary material for: Constitutive Expression in Komagataella phaffii of Mature Rhizopus oryzae Lipase Jointly with Its Truncated Prosequence Improves Production and the Biocatalyst Operational Stability
Source: MDPI journal article supplement (doi:10.3390/catal11101192), 2021-09-30
Supplement: s1 [file s1]

Archive with 1 entries (1 files):
- catalysts-1398046-supplementary.pdf
